# Supplementary material for: Synergistic Integration of MXene and Metal-Organic Frameworks for Enhanced Electrocatalytic Hydrogen Evolution in an Alkaline Environment
Source: MDPI journal article supplement (doi:10.3390/catal13050802), 2023-04-26
Supplement: s1 [file s1]

## Supplementary Information

# Synergistic Integration of MXene and Metal-Organic Frameworks for Enhanced Electrocatalytic Hydrogen Evolution in an Alkaline Environment

Low Ping Hao <sup>1</sup>, Abdul Hanan <sup>2</sup>, Rashmi Walvekar <sup>1,\*</sup>, Mohammad Khalid <sup>2,3,4,\*</sup>, Faiza Bibi <sup>2</sup>, Wai Yin Wong <sup>5</sup> and Chander Prakash <sup>6</sup>

<sup>1</sup> School of New Energy and Chemical Engineering, Xiamen University Malaysia, Jalan Sunsuria, Bandar Sunsuria, Sepang 43900, Selangor, Malaysia; cme1904905@xmu.edu.my

<sup>2</sup> Graphene & Advanced 2D Materials Research Group (GAMRG), School of Engineering and Technology, Sunway University, No. 5, Jalan Universiti, Bandar Sunway, Petaling Jaya 47500, Selangor, Malaysia; ahanansamo@gmail.com (A.H.); faiza.b@iemail.sunway.edu.my (F.B.)

<sup>3</sup> Division of Research and Development, Lovely Professional University, Phagwara 144411, Punjab, India;

<sup>4</sup> Uttaranchal University, Dehradun 248007, Uttarakhand, India;

<sup>5</sup> Fuel Cell Institute, Universiti Kebangsaan Malaysia, Bangi UKM 43600, Selangor, Malaysia; waiyin.wong@ukm.edu.my

<sup>6</sup> School of Mechanical Engineering, Lovely Professional University, Phagwara 144411, Punjab, India; chander.mechengg@gmail.com

\* Correspondence: rashmi.walvekar@xmu.edu.my (R.W.); khalids@sunway.edu.my (M.K.)

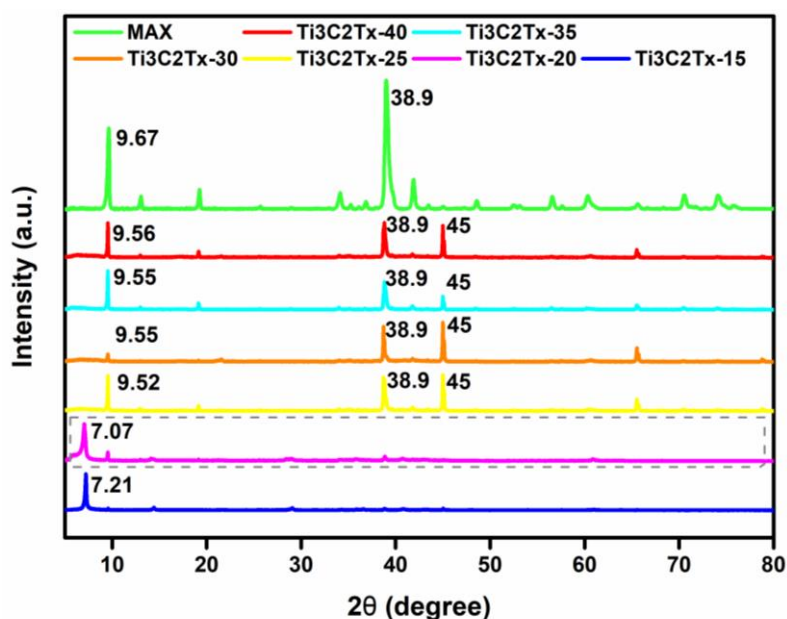

Figure S1. XRD of MXene  $\text{Ti}_3\text{C}_2\text{T}_x$  with microwave irradiation time of 15-40 minutes.

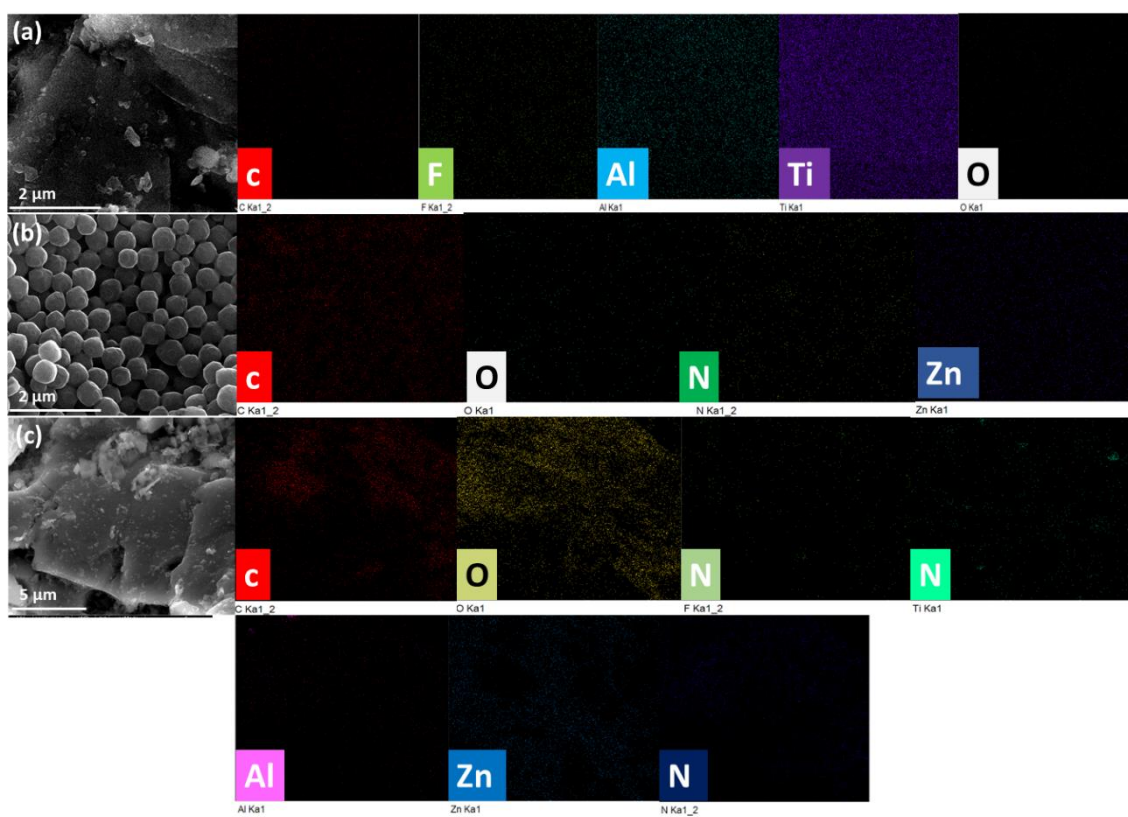

Figure S2. EDS elemental mapping of various materials (a)  $\text{Ti}_3\text{C}_2\text{T}_x$  (b) ZIF-8 (c)  $\text{Ti}_3\text{C}_2\text{T}_x@\text{ZIF-8}$

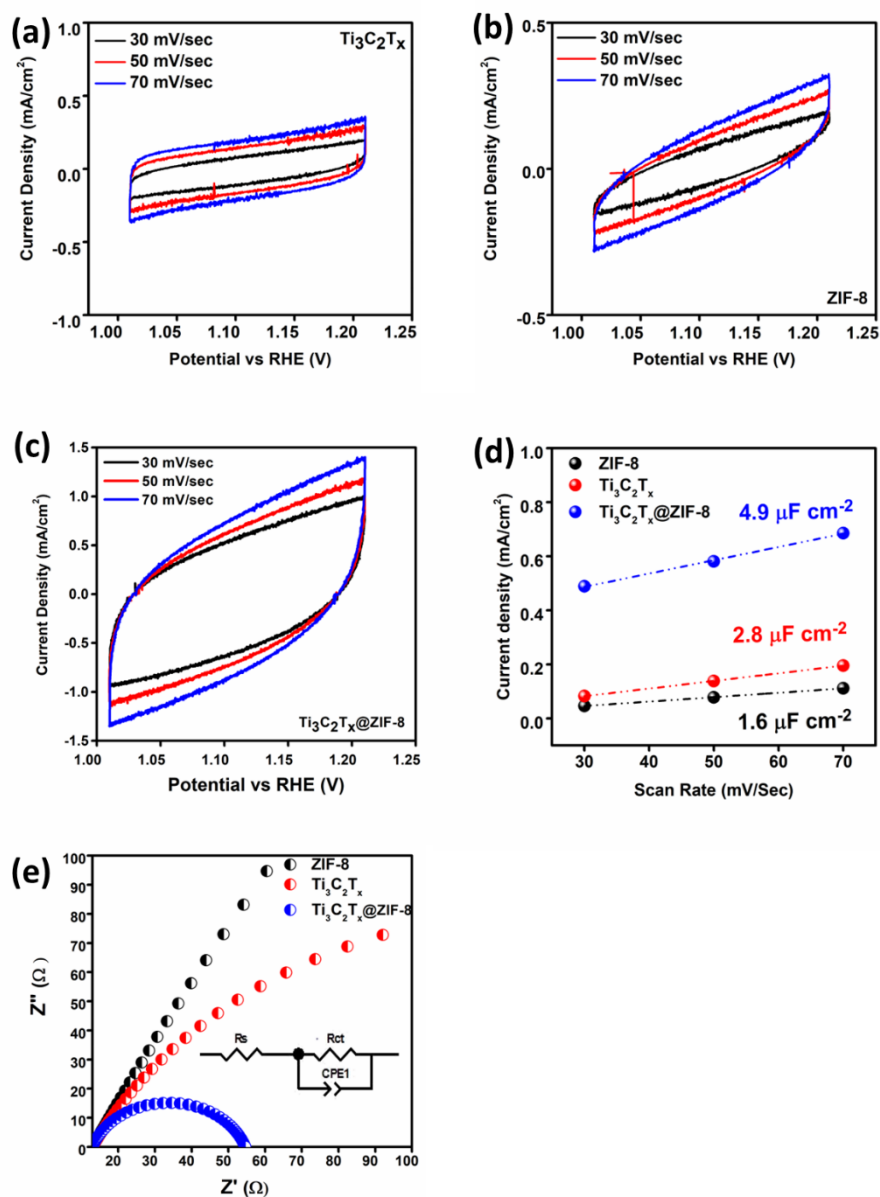

Figure S3. CV curves of various materials at scan rates of 30, 50, and 70 mV/sec; (a)  $\text{Ti}_3\text{C}_2\text{T}_x$ , (b) ZIF-8, (c)  $\text{Ti}_3\text{C}_2\text{T}_x@\text{ZIF-8}$ . (d) Double layer capacitance ( $C_{dl}$ ) values calculated from CV scan rates by linear fitting of potential as well as current densities (e) Nyquist plots (calculated through EIS analysis) for various materials.
